# Supplementary material for: Minor physical anomalies in neurodevelopmental disorders: a twin study
Source: Child Adolesc Psychiatry Ment Health. 2017 Nov 28;11:57. doi: 10.1186/s13034-017-0195-y (PMC5706157; doi:10.1186/s13034-017-0195-y)
Supplement: Supplementary file 5 — Additional file 5: Table S5. All cohort and within-pair estimates of relationship between MPAs, categorical diagnoses and dimensional variables. [file 13034_2017_195_MOESM5_ESM.docx]

Supplementary Table 5: All Cohort and Within-Pair Estimates of Relationship Between MPAs, Categorical Diagnoses and Dimensional Variables

|  |  | Cohort Estimate | | | | Within-Pair Conditional Estimate | | | | MZ Only Within-Pair Conditional Estimate | | | |
| --- | --- | --- | --- | --- | --- | --- | --- | --- | --- | --- | --- | --- | --- |
| Categorical Diagnoses |  | Beta | OR | 95% CI (OR) | p-value | Beta | OR | 95% CI (OR) | p-value | Beta | OR | 95% CI (OR) | p-value |
| ASD and MPAs | No Adjustments |  |  |  |  |  |  |  |  |  |  |  |  |
|  | Adjusted for IQ |  |  |  |  |  |  |  |  |  |  |  |  |
|  | Adjusted for ADHD |  |  |  |  |  |  |  |  |  |  |  |  |
|  | Adjusted for NDDs |  |  |  |  |  |  |  |  |  |  |  |  |
| ADHD and MPAs | No Adjustments |  |  |  |  |  |  |  |  |  |  |  |  |
|  | Adjusted for IQ |  |  |  |  |  |  |  |  |  |  |  |  |
|  | Adjusted for ASD |  |  |  |  |  |  |  |  |  |  |  |  |
|  | Adjusted for NDDs |  |  |  |  |  |  |  |  |  |  |  |  |
| NDDs and MPAs | No Adjustments |  |  |  |  |  |  |  |  |  |  |  |  |
|  | Adjusted for IQ |  |  |  |  |  |  |  |  |  |  |  |  |
| Dimensional Traits |  | Beta | SE | 95% CI (Beta) | p-value | Beta | SE | 95% CI (Beta) | p-value | Beta | SE | 95% CI (Beta) | p-value |
| IQ and MPAs | No Adjustments |  |  |  |  |  |  |  |  |  |  |  |  |
| SRS-2 and MPAs | No Adjustments |  |  |  |  |  |  |  |  |  |  |  |  |
|  | Adjusted for IQ |  |  |  |  |  |  |  |  |  |  |  |  |

All cohort and within-pairs GEE analyses of association between the number of MPAs and either categorical or dimensional diagnoses, including adjustments for IQ and diagnoses. Note: MPAs=Minor Physical Anomalies, MZ=Monozygotic, IQ=Intelligence Quotient, ASD=Autism Spectrum Disorder, ADHD=Attention–Deficit/Hyperactivity Disorder, ID=Intellectual Disability, NDD=Neurodevelopmental Disorder, SRS-2= Social Responsiveness Scale-2
